# Supplementary material for: Tumorigenesis and peritoneal colonization from fallopian tube epithelium
Source: PubMed Central journal article supplement (PMC4653021; doi:10.18632/oncotarget.3985), 2015-05-04
Supplement: oncotarget-06-20500-s001.pdf [file oncotarget-06-20500-s001.pdf]

# Tumorigenesis and peritoneal colonization from fallopian tube epithelium

## Supplementary Material

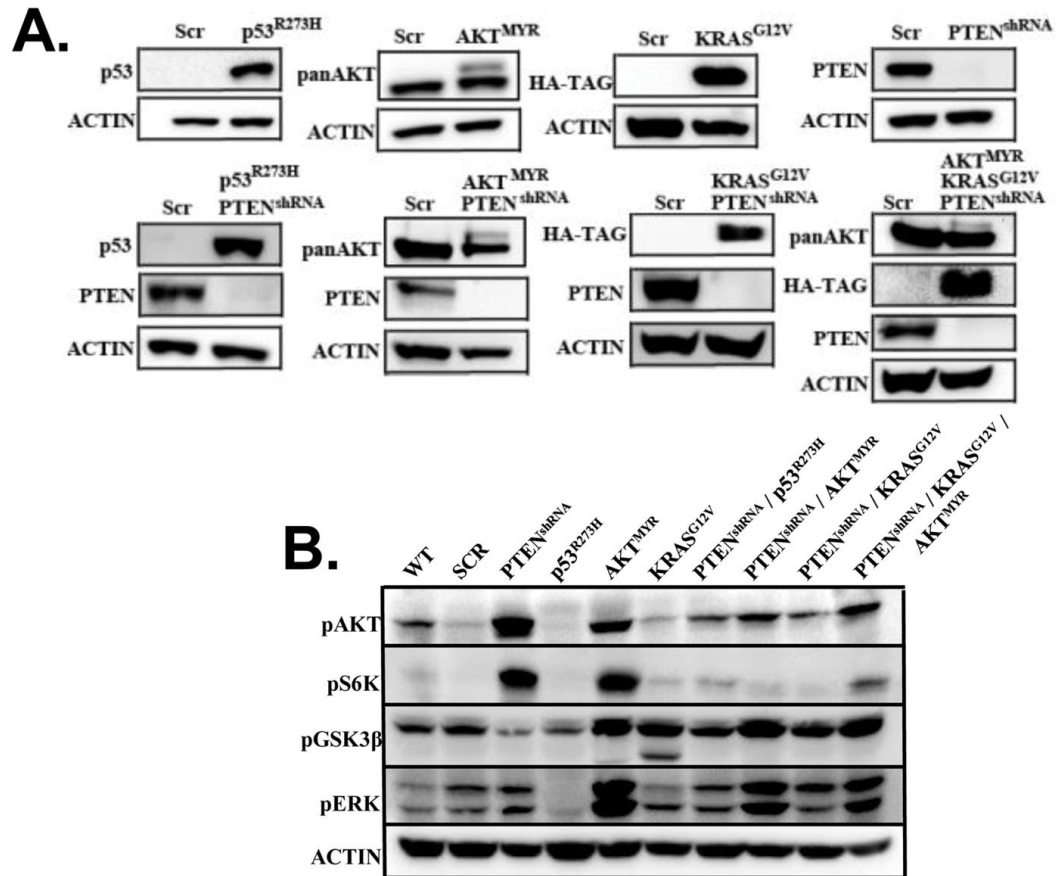

**Supplementary Figure 1: Validation of genetically engineered MOE.** A) Stable MOE cell lines were validated via western blotting to express targets of interest as compared to scrambled shRNA (SCR) transfected control MOE cells. Specifically, stabilized p53 expression, which is indicative of mutation, double-banding of pan-AKT which demonstrates myristolation, HA-Tag expression by the KRAS plasmid, and absence of PTEN expression when transfected with shRNA. B) Further, cell lines were evaluated for downstream signaling changes via western blotting, to demonstrate that both select targets and their signaling pathways were functionally altered. WT= wildtype parental MOE cells.

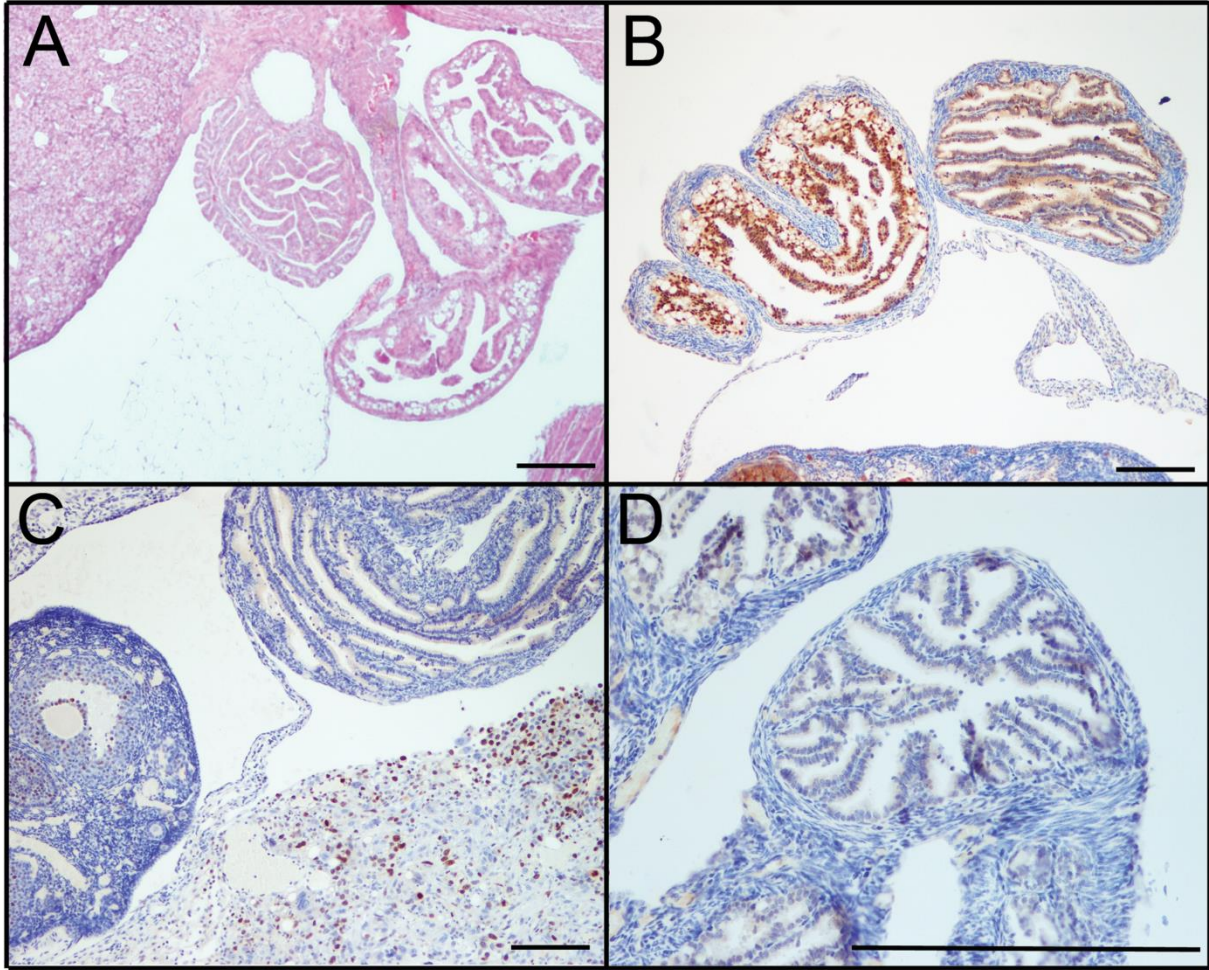

**Supplementary Figure 2: Tumorigenic MOE do not metastasize to the oviduct.** **A)** H&E staining demonstrated that although tumors were found on adjacent ovaries, no oviductal involvement was found in any MOE grafted mice. **B)** Oviducts remained normal, as shown by PAX8 staining, **C)** with no infiltration of highly proliferative (Ki67) tumors and **D)** no stabilization of p53. Scale bars equal 200 microns.

**Supplementary Table 1: Plasmids utilized for MOE cell development**

| <b>Target</b>                     | <b>Vector</b>    | <b>Manufacturer</b> | <b>Antibiotic Maintenance</b> |
|-----------------------------------|------------------|---------------------|-------------------------------|
| <b>Scrambled non-coding shRNA</b> | pLKO.1 puro      | Sigma               | 0.5 µg/ml puromycin (Sigma)   |
| <b>PTEN shRNA</b>                 | pLKO.1 puro      | Sigma               | 0.5 µg/ml puromycin (Sigma)   |
| <b>KRAS G12V</b>                  | pLenti-PGK-Hygro | Addgene (35633)     | 200 µg/ml hygromycin (Sigma)  |
| <b>myristoylated AKT</b>          | pcDNA3 Myr HAtag | Addgene (9008)      | 300 µg/ml neomycin (Sigma)    |
| <b>p53 R273H</b>                  | pCMV-Neo-Bam     | Addgene (16439)     | 300 µg/ml neomycin (Sigma)    |

**Supplementary Table 2: Western blotting and immunohistochemical antibodies**

| <b>Target</b>                               | <b>Manufacturer</b> | <b>Dilution Factor</b> | <b>Blocking Buffer</b> |
|---------------------------------------------|---------------------|------------------------|------------------------|
| <b>Antibodies for western blotting:</b>     |                     |                        |                        |
| <b>p53</b>                                  | Santa Cruz          | 1:1000                 | 5% milk-TBST           |
| <b>pan AKT</b>                              | Cell Signaling      | 1:500                  | 5% BSA-TBST            |
| <b>HA-Tag</b>                               | Cell Signaling      | 1:500                  | 5% milk-TBST           |
| <b>PTEN</b>                                 | Cell Signaling      | 1:1000                 | 5% BSA-TBST            |
| <b>phospho-AKT</b>                          | Cell Signaling      | 1:500                  | 5% BSA-TBST            |
| <b>phospho-S6K</b>                          | Cell Signaling      | 1:500                  | 5% BSA-TBST            |
| <b>phospho-GSK3<math>\beta</math></b>       | Cell Signaling      | 1:500                  | 5% milk-TBST           |
| <b>phospho-ERK</b>                          | Cell Signaling      | 1:1000                 | 5% BSA-TBST            |
| <b>ACTIN</b>                                | Sigma               | 1:1000                 | 5% milk-TBST           |
| <b>Antibodies for immunohistochemistry:</b> |                     |                        |                        |
| <b>CK8</b>                                  | Iowa Hybridoma Bank | 1:200                  | rabbit serum-TBS/BSA   |
| <b>PAX8</b>                                 | Proteintech         | 1:100                  | goat serum-TBS/BSA     |
| <b>WT1</b>                                  | Abcam               | 1:50                   | goat serum-TBS/BSA     |
| <b>p53</b>                                  | Santa Cruz          | 1:50                   | goat serum-TBS/BSA     |
| <b>Ki-67</b>                                | Abcam               | 1:100                  | goat serum-TBS/BSA     |
